# Supplementary material for: Synthesis of natural–synthetic hybrid materials from cellulose via the RAFT process
Source: Royal Society of Chemistry journal article supplement (doi:10.1039/b711248n), 2007-12-11
Supplement: b711248n.pdf [file b711248n.pdf]

**Synthesis of natural / synthetic hybrid materials from cellulose via the RAFT process.**

Debashish Roy, James T. Guthrie and Sébastien Perrier\*

*Department of Colour and Polymer Chemistry, University of Leeds, Woodhouse lane, Leeds LS2 9JT, UK*

*Tel: +44 113 343 2932, fax: +44 113 343 2947 \*s.perrier@leeds.ac.uk*

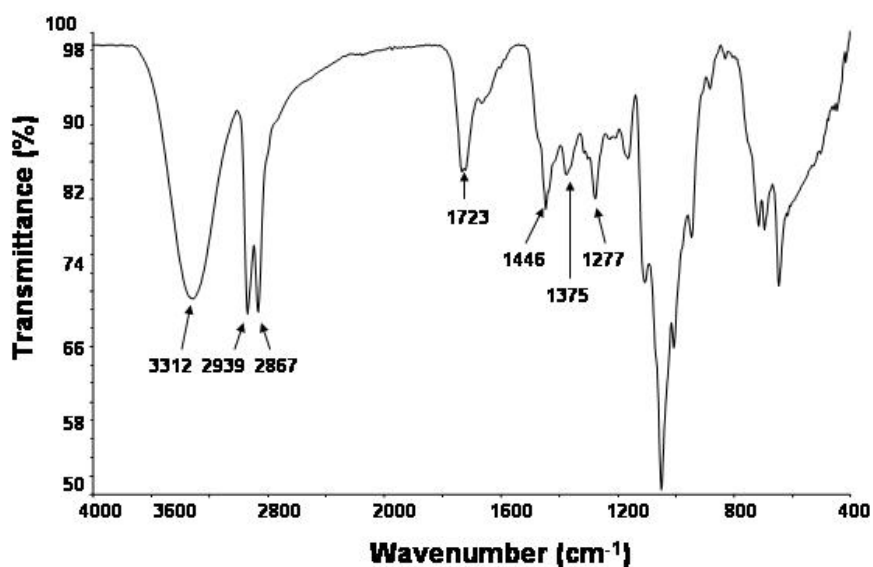

**Figure 1** . ATR FT-IR spectra of cleaved PDMAEMA from cellulose backbone after acid hydrolysis showing a decrease in the  $N(CH_3)_2$  group ( $2939, 2867\text{ cm}^{-1}$ ) by comparison to the carbonyl group ( $1723\text{ cm}^{-1}$ ) and the presence of a stretch at  $1742\text{ cm}^{-1}$  characteristic of carboxylic acid.

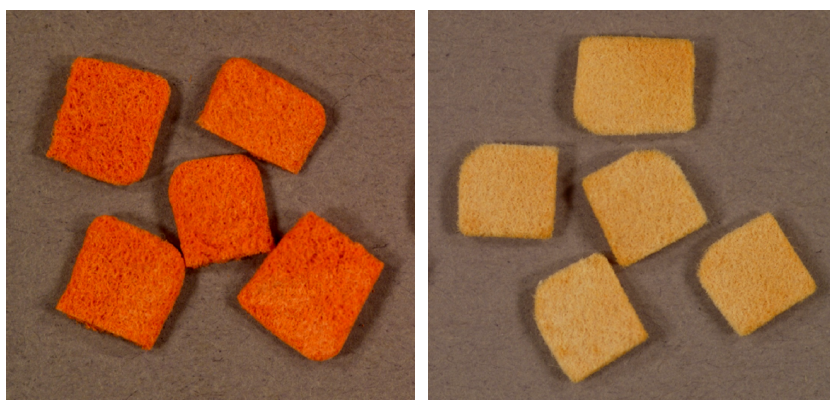

**Figure 2** . Photograph of cellulose-g-PDMAEMA (a) before aminolysis and (b) after aminolysis

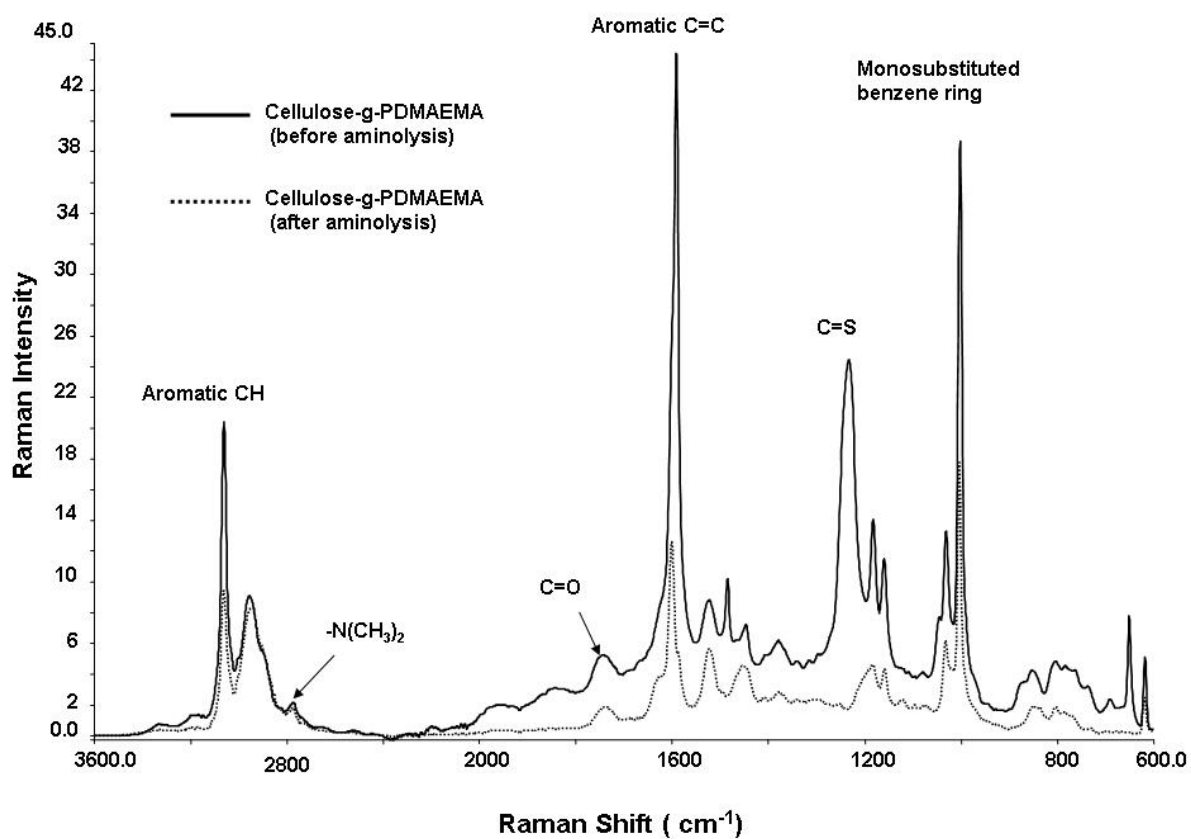

**Figure 3**. FT-Raman spectra of cellulose-g-PDMAEMA before and after aminolysis

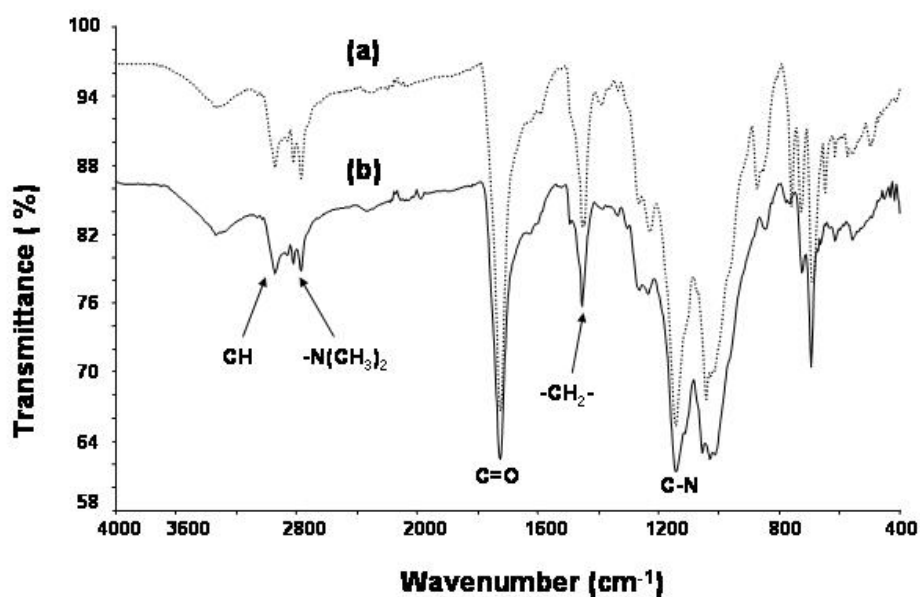

Figure 4. ATR FT-IR spectra of cellulose-g-PDMAEMA (a) before aminolysis and (b) after aminolysis

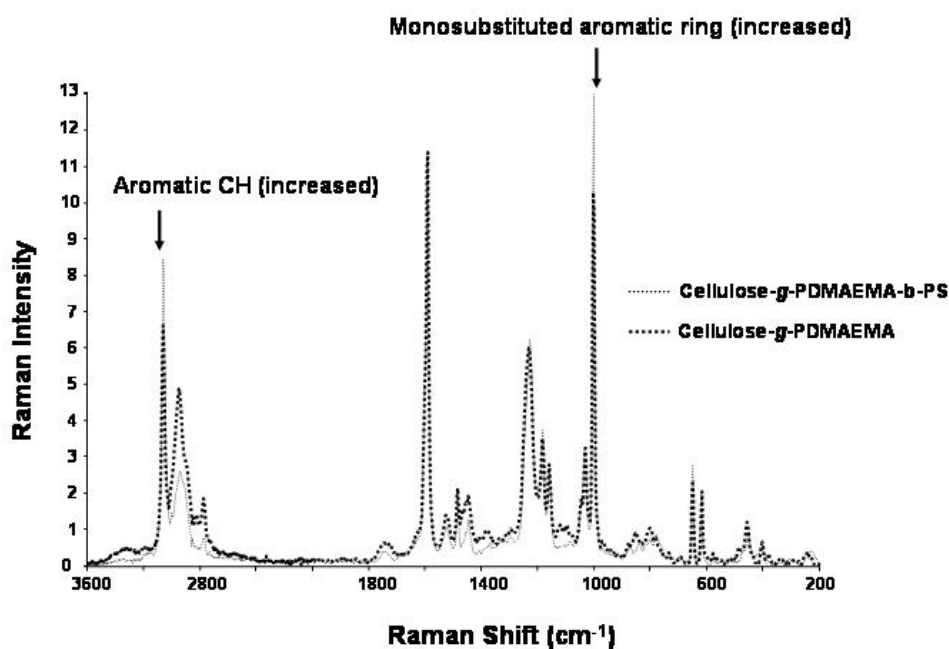

Figure 5. FT-Raman spectrum of cellulose-PDMAEMA before and after block extension with PSt

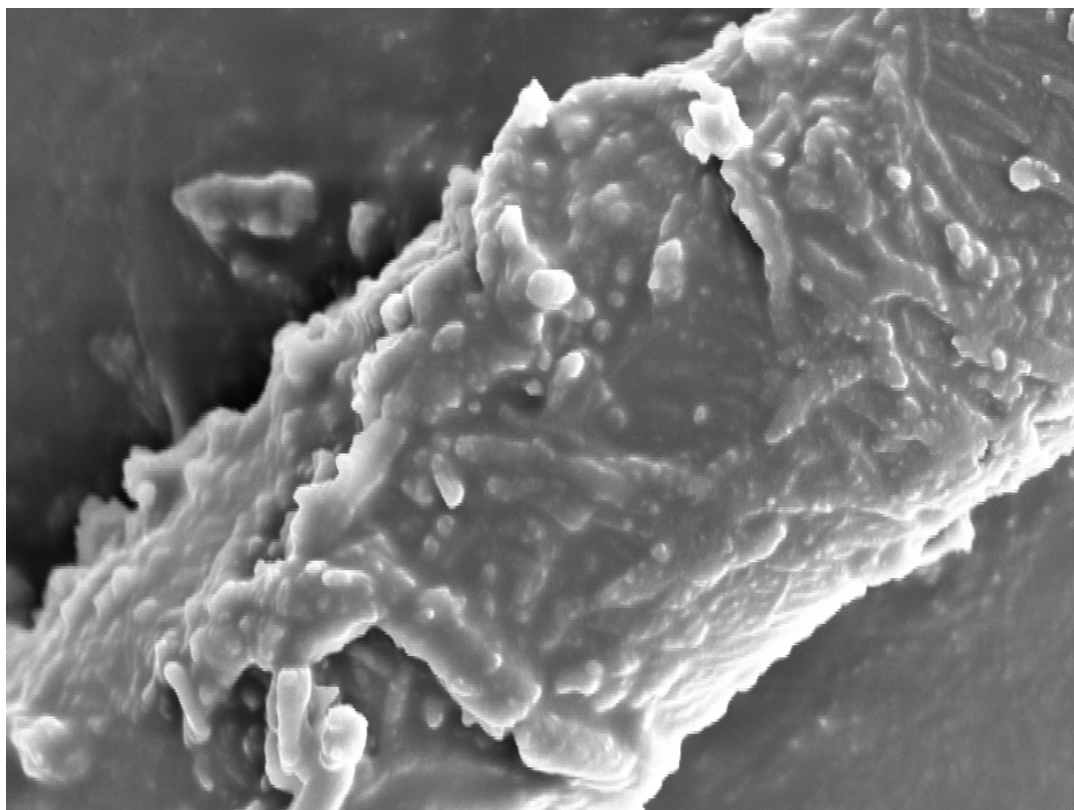

—10 $\mu$ m  
×1200 Magnification

**Figure 6.** SEM photomicrograph showing the surface morphology of cellulose-g-(PDMAMEA-b-PS)
